# Supplementary material for: Shallow Seafloor Sediments: Density and Shear Wave Velocity
Source: Atypon-hosted journal article supplement (doi:10.1061/jggefk.gteng-10759), 2023-03-01
Supplement: supplemental_material_jggefk.gteng-10759_ramirez.pdf [file supplemental_material_jggefk.gteng-10759_ramirez.pdf]

## SUPPLEMENTAL MATERIALS

*ASCE Journal of Geotechnical and Geoenvironmental Engineering*

# Shallow Seafloor Sediments: Density and Shear Wave Velocity

Marisol Salva Ramirez, Junghee Park, Marco Terzariol, Jiming  
Jiang, and J. Carlos Santamarina

**DOI:** 10.1061/JGGEFK.GTENG-10759

© ASCE 2022

[www.ascelibrary.org](http://www.ascelibrary.org)

(a) Published data

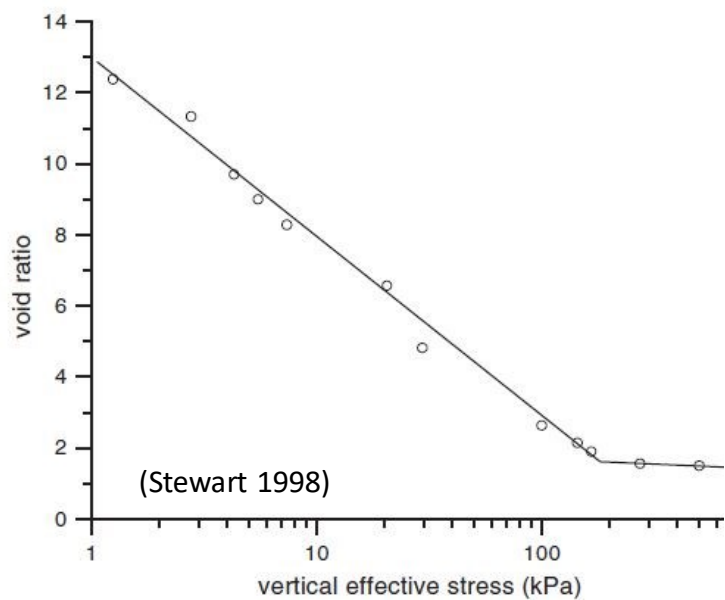

(b) Data extraction

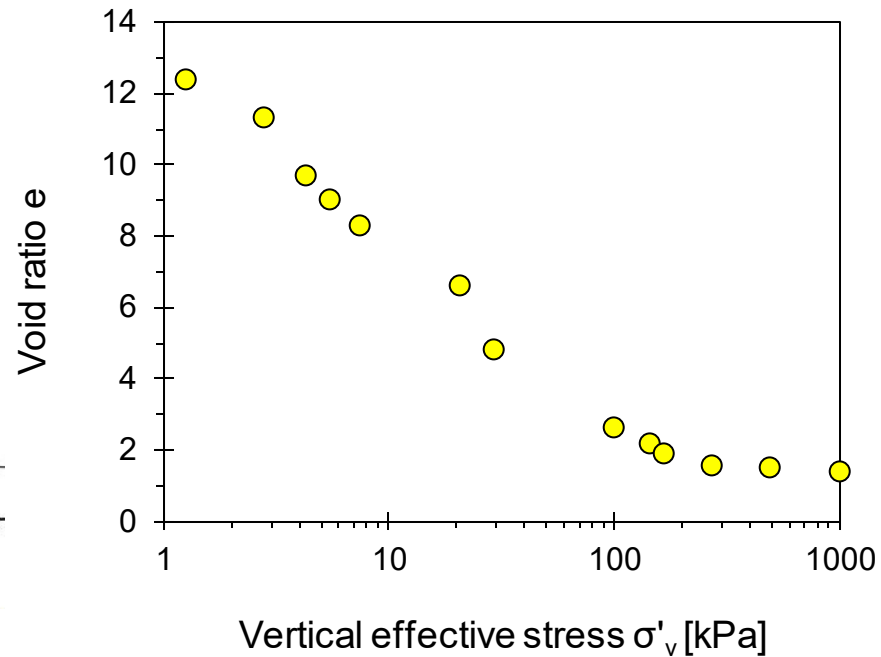

(c) Curve fitting to determine  $e_L$

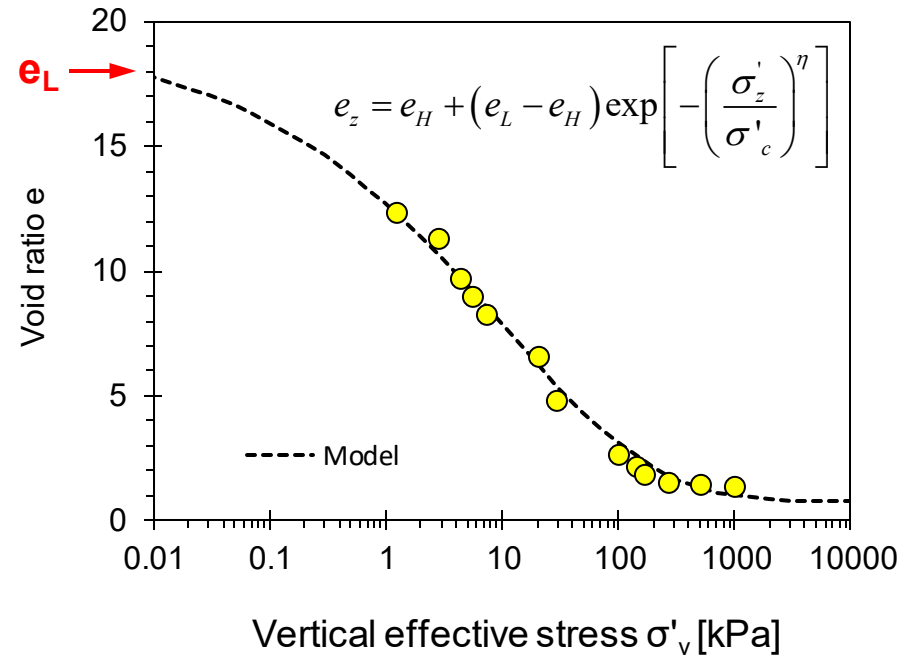

**Fig. S1.** Asymptotic void ratio determination from consolidation data. We fit the asymptotically-correct consolidation model to 1D oedometer data to determine the asymptotic void ratios  $e_L$  at  $\sigma'_z \rightarrow 0$  and  $e_H$  at  $\sigma'_z \rightarrow \infty$ , and the characteristic effective stress  $\sigma'_c$ . Based on extensive database studies, the model parameter  $\eta$  is assumed  $\eta=1/3$  in all cases.

## Card castle in 3D

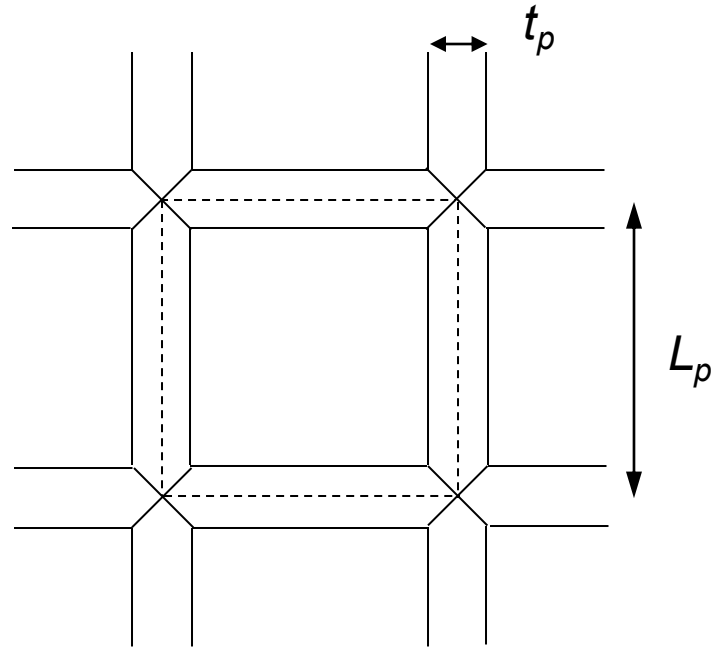

Variation of  $e_L$  with the slenderness ratio  $a$

| $a$  | $e_L$ | $\approx e_L$ |
|------|-------|---------------|
| 1    | 0     | 0             |
| 10   | 2.7   | 3             |
| 100  | 33    | 33            |
| 200  | 66    | 66            |
| 1000 | 333   | 333           |

Slenderness  $a = \frac{L_p}{t_p}$

Void ratio  $e_L = \frac{(L_p - t_p)^3}{L_p^3 - (L_p - t_p)^3} = \frac{(a-1)^3}{a^3 - (a-1)^3}$  For high  $a$ ,  $e_L = \frac{a-2}{3}$

**Fig. S2.** The void ratio for an open 3D card-castle configuration provides an estimate of  $e_L$  for platy particles. Particle geometry: length  $L_p$  and thickness  $t_p$ , slenderness ratio  $a = L_p/t_p$ . The asymptotic void ratio approaches to  $e_L \approx (a-2)/3$  for high slenderness ratio.
